# Supplementary material
Source: publisher figshare collection journal article supplement (https://karger.figshare.com/ndownloader/files/33157517)
Supplement: Supplementary file 1 [file 33157517]

**Supplemental Content**

**eAppendix 1.** EMBASE search strategy for the systematic review

((("nails"[MeSH Terms] OR nail* OR fingernail* OR toenail* OR thumbnail*) AND ("psoriasis"[MeSH Terms] OR psoriasis*)) OR "nail psoriasis") AND ("Clinical Trial" [Publication Type] OR "Clinical Trials as Topic"[Mesh] OR "clinical trial"[tiab] OR "clinical trials"[tiab]).

**eAppendix 2.** Bibliography of included studies

1. Abe M, Nishigori C, Torii H, et al. Tofacitinib for the treatment of moderate to severe chronic plaque psoriasis in Japanese patients: Subgroup analyses from a randomized, placebo-controlled phase 3 trial. *J Dermatol.* 2017;44(11):1228-1237.

2. Al-Mutairi N, Nour T, Al-Rqobah D. Onychomycosis in patients of nail psoriasis on biologic therapy: a randomized, prospective open label study comparing Etanercept, Infliximab and Adalimumab. *Expert Opin Biol Ther.* 2013;13(5):625-629.

3. Blauvelt A, Papp KA, Griffiths CE, et al. Efficacy and safety of guselkumab, an anti-interleukin-23 monoclonal antibody, compared with adalimumab for the continuous treatment of patients with moderate to severe psoriasis: Results from the phase III, double-blinded, placebo- and active comparator-controlled VOYAGE 1 trial. *J Am Acad Dermatol.* 2017;76(3):405-417.

4. Boontaveeyuwat E, Silpa-Archa N, Danchaivijitr N, Wongpraparut C. A randomized comparison of efficacy and safety of intralesional triamcinolone injection and clobetasol propionate ointment for psoriatic nails. *J Dermatolog Treat.* 2019;30(2):117-122.

5. Cannavo SP, Guarneri F, Vaccaro M, Borgia F, Guarneri B. Treatment of psoriatic nails with topical cyclosporin: a prospective, randomized placebo-controlled study. *Dermatology.* 2003;206(2):153-156.

6. Coates LC, Helliwell PS. Methotrexate Efficacy in the Tight Control in Psoriatic Arthritis Study. *J Rheumatol.* 2016;43(2):356-361.

7. de Jong EM, Menke HE, van Praag MC, van De Kerkhof PC. Dystrophic psoriatic fingernails treated with 1% 5-fluorouracil in a nail penetration-enhancing vehicle: a double-blind study. *Dermatology.* 1999;199(4):313-318.

8. De Simone C, Maiorino A, Tassone F, D'Agostino M, Caldarola G. Tacrolimus 0.1% ointment in nail psoriasis: a randomized controlled open-label study. *J Eur Acad Dermatol Venereol.* 2013;27(8):1003-1006.

9. Elewski BE, Okun MM, Papp K, et al. Adalimumab for nail psoriasis: Efficacy and safety from the first 26 weeks of a phase 3, randomized, placebo-controlled trial. *J Am Acad Dermatol.* 2018;78(1):90-99 e91.

10. Feuerman EJ, Nir MA. Allopurinol in psoriasis--a double-blind study. *Br J Dermatol.* 1973;89(1):83-86.

11. Foley P, Gordon K, Griffiths CEM, et al. Efficacy of Guselkumab Compared With Adalimumab and Placebo for Psoriasis in Specific Body Regions: A Secondary Analysis of 2 Randomized Clinical Trials. *JAMA Dermatol.* 2018;154(6):676-683.

12. Gumusel M, Ozdemir M, Mevlitoglu I, Bodur S. Evaluation of the efficacy of methotrexate and cyclosporine therapies on psoriatic nails: a one-blind, randomized study. *J Eur Acad Dermatol Venereol.* 2011;25(9):1080-1084.

13. Igarashi A, Kato T, Kato M, Song M, Nakagawa H, Japanese Ustekinumab Study G. Efficacy and safety of ustekinumab in Japanese patients with moderate-to-severe plaque-type psoriasis: long-term results from a phase 2/3 clinical trial. *J Dermatol.* 2012;39(3):242-252.

14. Kavanaugh A, McInnes I, Mease P, et al. Golimumab, a new human tumor necrosis factor alpha antibody, administered every four weeks as a subcutaneous injection in psoriatic arthritis: Twenty-four-week efficacy and safety results of a randomized, placebo-controlled study. *Arthritis Rheum.* 2009;60(4):976-986.

15. Kole L, Cantrell W, Elewski B. A randomized, double-blinded trial evaluating the efficacy and tolerability of vectical ointment (calcitriol 3 mcg/g ointment) when compared to betamethasone diproprionate ointment (64 mg/g) in patients with nail psoriasis. *J Drugs Dermatol.* 2014;13(8):912-915.

16. Langley RG, Rich P, Menter A, et al. Improvement of scalp and nail lesions with ixekizumab in a phase 2 trial in patients with chronic plaque psoriasis. *J Eur Acad Dermatol Venereol.* 2015;29(9):1763-1770.

17. Lassus A. Colloidal silicic acid for the treatment of psoriatic skin lesions, arthropathy and onychopathy. A pilot study. *J Int Med Res.* 1997;25(4):206-209.

18. Leonardi C, Langley RG, Papp K, et al. Adalimumab for treatment of moderate to severe chronic plaque psoriasis of the hands and feet: efficacy and safety results from REACH, a randomized, placebo-controlled, double-blind trial. *Arch Dermatol.* 2011;147(4):429-436.

19. Leonardi C, Matheson R, Zachariae C, et al. Anti-interleukin-17 monoclonal antibody ixekizumab in chronic plaque psoriasis. *N Engl J Med.* 2012;366(13):1190-1199.

20. Lin YK, Chang YC, Hui RC, et al. A Chinese Herb, Indigo Naturalis, Extracted in Oil (Lindioil) Used Topically to Treat Psoriatic Nails: A Randomized Clinical Trial. *JAMA Dermatol.* 2015;151(6):672-674.

21. Lin YK, See LC, Huang YH, et al. Efficacy and safety of Indigo naturalis extract in oil (Lindioil) in treating nail psoriasis: a randomized, observer-blind, vehicle-controlled trial. *Phytomedicine.* 2014;21(7):1015-1020.

22. Luger TA, Barker J, Lambert J, et al. Sustained improvement in joint pain and nail symptoms with etanercept therapy in patients with moderate-to-severe psoriasis. *J Eur Acad Dermatol Venereol.* 2009;23(8):896-904.

23. Mahrle G, Schulze HJ, Farber L, Weidinger G, Steigleder GK. Low-dose short-term cyclosporine versus etretinate in psoriasis: improvement of skin, nail, and joint involvement. *J Am Acad Dermatol.* 1995;32(1):78-88.

24. Mease PJ, Fleischmann R, Deodhar AA, et al. Effect of certolizumab pegol on signs and symptoms in patients with psoriatic arthritis: 24-week results of a Phase 3 double-blind randomised placebo-controlled study (RAPID-PsA). *Ann Rheum Dis.* 2014;73(1):48-55.

25. Mease PJ, Smolen JS, Behrens F, et al. A head-to-head comparison of the efficacy and safety of ixekizumab and adalimumab in biological-naive patients with active psoriatic arthritis: 24-week results of a randomised, open-label, blinded-assessor trial. *Ann Rheum Dis.* 2020;79(1):123-131.

26. Merola JF, Elewski B, Tatulych S, Lan S, Tallman A, Kaur M. Efficacy of tofacitinib for the treatment of nail psoriasis: Two 52-week, randomized, controlled phase 3 studies in patients with moderate-to-severe plaque psoriasis. *J Am Acad Dermatol.* 2017;77(1):79-87 e71.

27. Nakamura RC, Abreu L, Duque-Estrada B, Tamler C, Leverone AP. Comparison of nail lacquer clobetasol efficacy at 0.05%, 1% and 8% in nail psoriasis treatment: prospective, controlled and randomized pilot study. *An Bras Dermatol.* 2012;87(2):203-211.

28. Ortonne JP, Paul C, Berardesca E, et al. A 24-week randomized clinical trial investigating the efficacy and safety of two doses of etanercept in nail psoriasis. *Br J Dermatol.* 2013;168(5):1080-1087.

29. Ozmen I, Erbil AH, Koc E, Tunca M. Treatment of nail psoriasis with tumor necrosis factor-alpha blocker agents: an open-label, unblinded, comparative study. *J Dermatol.* 2013;40(9):755-756.

30. Papp K, Reich K, Leonardi CL, et al. Apremilast, an oral phosphodiesterase 4 (PDE4) inhibitor, in patients with moderate to severe plaque psoriasis: Results of a phase III, randomized, controlled trial (Efficacy and Safety Trial Evaluating the Effects of Apremilast in Psoriasis [ESTEEM] 1). *J Am Acad Dermatol.* 2015;73(1):37-49.

31. Paul C, Cather J, Gooderham M, et al. Efficacy and safety of apremilast, an oral phosphodiesterase 4 inhibitor, in patients with moderate-to-severe plaque psoriasis over 52 weeks: a phase III, randomized controlled trial (ESTEEM 2). *Br J Dermatol.* 2015;173(6):1387-1399.

32. Paul C, Reich K, Gottlieb AB, et al. Secukinumab improves hand, foot and nail lesions in moderate-to-severe plaque psoriasis: subanalysis of a randomized, double-blind, placebo-controlled, regimen-finding phase 2 trial. *J Eur Acad Dermatol Venereol.* 2014;28(12):1670-1675.

33. Reich K, Gooderham M, Bewley A, et al. Safety and efficacy of apremilast through 104 weeks in patients with moderate to severe psoriasis who continued on apremilast or switched from etanercept treatment: findings from the LIBERATE study. *J Eur Acad Dermatol Venereol.* 2018;32(3):397-402.

34. Reich K, Nestle FO, Papp K, et al. Infliximab induction and maintenance therapy for moderate-to-severe psoriasis: a phase III, multicentre, double-blind trial. *Lancet.* 2005;366(9494):1367-1374.

35. Reich K, Sullivan J, Arenberger P, et al. Effect of secukinumab on the clinical activity and disease burden of nail psoriasis: 32-week results from the randomized placebo-controlled TRANSFIGURE trial. *Br J Dermatol.* 2019;181(5):954-966.

36. Rich P, Bourcier M, Sofen H, et al. Ustekinumab improves nail disease in patients with moderate-to-severe psoriasis: results from PHOENIX 1. *Br J Dermatol.* 2014;170(2):398-407.

37. Rigopoulos D, Gregoriou S, Katsambas A. Treatment of psoriatic nails with tazarotene cream 0.1% vs. clobetasol propionate 0.05% cream: a double-blind study. *Acta Derm Venereol.* 2007;87(2):167-168.

38. Saraceno R, Pietroleonardo L, Mazzotta A, Zangrilli A, Bianchi L, Chimenti S. TNF-alpha antagonists and nail psoriasis: an open, 24-week, prospective cohort study in adult patients with psoriasis. *Expert Opin Biol Ther.* 2013;13(4):469-473.

39. Scher RK, Stiller M, Zhu YI. Tazarotene 0.1% gel in the treatment of fingernail psoriasis: a double-blind, randomized, vehicle-controlled study. *Cutis.* 2001;68(5):355-358.

40. Thaci D, Ortonne JP, Chimenti S, et al. A phase IIIb, multicentre, randomized, double-blind, vehicle-controlled study of the efficacy and safety of adalimumab with and without calcipotriol/betamethasone topical treatment in patients with moderate to severe psoriasis: the BELIEVE study. *Br J Dermatol.* 2010;163(2):402-411.

41. Torii H, Nakagawa H, Japanese Infliximab Study i. Infliximab monotherapy in Japanese patients with moderate-to-severe plaque psoriasis and psoriatic arthritis. A randomized, double-blind, placebo-controlled multicenter trial. *J Dermatol Sci.* 2010;59(1):40-49.

42. Tosti A, Piraccini BM, Cameli N, et al. Calcipotriol ointment in nail psoriasis: a controlled double-blind comparison with betamethasone dipropionate and salicylic acid. *Br J Dermatol.* 1998;139(4):655-659.

43. Tzung TY, Chen CY, Yang CY, Lo PY, Chen YH. Calcipotriol used as monotherapy or combination therapy with betamethasone dipropionate in the treatment of nail psoriasis. *Acta Derm Venereol.* 2008;88(3):279-280.

44. van de Kerkhof P, Guenther L, Gottlieb AB, et al. Ixekizumab treatment improves fingernail psoriasis in patients with moderate-to-severe psoriasis: results from the randomized, controlled and open-label phases of UNCOVER-3. *J Eur Acad Dermatol Venereol.* 2017;31(3):477-482.

45. Walsh JA, Gottlieb AB, Hoepken B, Nurminen T, Mease PJ. Efficacy of certolizumab pegol with and without concomitant use of disease-modifying anti-rheumatic drugs over 4 years in psoriatic arthritis patients: results from the RAPID-PsA randomized controlled trial. *Clin Rheumatol.* 2018;37(12):3285-3296.
